# Supplementary material
Source: publisher site journal article supplement (https://www.dovepress.com/article/582503)
Supplement: Supplementary file 1 [file Supplemental%20Box%201.%20Iowa%20Satisfaction%20with%20Anesthesia%20Scale.docx]

| **Supplemental Box 1. Iowa Satisfaction with Anesthesia Scale** |
| --- |
| I threw up or felt like throwing up. * |
| I would have the same anesthetic again. |
| I itched. * |
| I felt relaxed. |
| I felt pain. * |
| I felt safe. |
| I was too hot or cold. * |
| I was satisfied with the anesthesia care. |
| I felt pain during surgery. * |
| I felt good. |
| I hurt. * |

Each item is rated on a 6-point Likert scale (“disagree very much”, “disagree moderately”, “disagree slightly”, “agree slightly”, “agree moderately”, “agree very much”). For analysis, responses are mapped to −3, −2, −1, +1, +2, +3. *The scores were reversed in negative questions.
